# Supplementary material for: Crohn’s Disease Increases the Mesothelial Properties of Adipocyte Progenitors in the Creeping Fat
Source: MDPI journal article supplement (doi:10.3390/ijms22084292), 2021-04-20
Supplement: s1 [file s1]

**Supplementary Table 1.** Human AT and ASCs Microarray Data

| Gene ID                    | Log FC<br>AT | Adjusted p-value<br>AT | Log FC<br>ASCs | Adjusted p-value<br>ASCs | Description                     |
|----------------------------|--------------|------------------------|----------------|--------------------------|---------------------------------|
| <b>Mesothelial markers</b> |              |                        |                |                          |                                 |
| WT1                        | <b>5.86</b>  | <b>3.83E-13</b>        | <b>1.85</b>    | <b>1.78E-05</b>          | Wilms tumor 1                   |
| MSLN                       | <b>4.23</b>  | <b>7.80E-12</b>        | <b>1.43</b>    | <b>4.57E-02</b>          | mesothelin                      |
| LRRN4                      | <b>3.55</b>  | <b>1.47E-15</b>        | 1.40           | 1.12E-01                 | leucine rich repeat neuronal 4  |
| KRT8                       | <b>2.15</b>  | <b>1.45E-10</b>        | 1.16           | 1.07E-01                 | keratin 8                       |
| CDH1                       | <b>2.07</b>  | <b>1.19E-07</b>        | 0.92           | 1.83E-01                 | cadherin 1                      |
| CNN1                       | <b>0.76</b>  | <b>6.18E-03</b>        | 0.81           | 3.73E-01                 | calponin 1                      |
| CDH2                       | <b>0.70</b>  | <b>2.81E-04</b>        | 0.55           | 4.32E-01                 | cadherin 2                      |
| TJP1                       | <b>0.27</b>  | <b>2.44E-02</b>        | 0.29           | 2.90E-01                 | tight junction protein 1        |
| KRT7                       | 0.09         | 3.79E-01               | 0.27           | 2.08E-01                 | keratin 7                       |
| UPK3A                      | -0.13        | 3.64E-01               | -0.02          | 9.82E-01                 | uroplakin 3A                    |
| CALB2                      | -0.17        | 3.64E-01               | -0.03          | 8.96E-01                 | calbindin 2                     |
| CA2                        | -0.30        | 6.05E-01               | -0.17          | 4.64E-01                 | carbonic anhydrase 2            |
| THBD                       | -0.42        | 1.11E-01               | -0.37          | 8.43E-01                 | thrombomodulin                  |
| SPP1                       | <b>-1.12</b> | <b>8.88E-03</b>        | <b>-0.84</b>   | <b>3.27E-02</b>          | secreted phosphoprotein 1       |
| <b>Mesenchymal markers</b> |              |                        |                |                          |                                 |
| CD36                       | <b>1.22</b>  | <b>2.64E-04</b>        | 0.33           | 3.90E-01                 | CD36 molecule                   |
| ENG                        | 0.24         | 2.51E-01               | -0.12          | 7.91E-01                 | endoglin                        |
| ANPEP                      | 0.08         | 5.53E-01               | <b>-0.70</b>   | <b>5.60E-03</b>          | alanyl aminopeptidase, membrane |
| NT5E                       | 0.05         | 8.30E-01               | <b>-0.93</b>   | <b>4.38E-02</b>          | 5'-nucleotidase ecto            |
| ITGA4                      | -0.23        | 3.01E-01               | <b>-1.0</b>    | <b>7.66E-04</b>          | integrin subunit alpha 4        |
| THY1                       | <b>-0.34</b> | <b>9.84E-03</b>        | -1.89          | 6.58E-02                 | Thy-1 cell surface antigen      |
| MME                        | <b>-1.56</b> | <b>1.37E-06</b>        | <b>-3.83</b>   | <b>1.26E-05</b>          | membrane metallo-endopeptidase  |

Microarray analyses revealed that mesothelial markers are upregulated in twenty visceral adipose tissue versus nineteen subcutaneous adipose tissue samples (accession number GSE20950). Microarray analyses revealed that mesothelial markers are upregulated in thirteen visceral AT-derived ASCs versus thirteen subcutaneous AT-derived ASCs samples (accession number GSE37324). Abbreviations: AT, adipose tissue; ASCs, adipose-derived stem cells. Bold text denotes genes with adjusted p-value < 0.05 by limma and adjusted by the Benjamini & Hochberg false discovery rate method.

**Supplementary Table 2.** Assays contained in TaqMan microfluidic card

| Gene                           | Official symbol | Taqman Assay ID | References |
|--------------------------------|-----------------|-----------------|------------|
| <b>Mesothelial markers</b>     |                 |                 |            |
| Wilms Tumor 1                  | WT1             | Hs01103751_m1   | [1 ]       |
| mesothelin                     | MSLN            | Hs00245879_m1   | [1]        |
| tight Junction Protein 1       | TJP1            | Hs01551861_m1   | [2]        |
| leucine rich repeat neuronal 4 | LRNN4           | Hs00379905_m1   | [3]        |
| uropod 3A                      | UPK3A           | Hs00199590_m1   | [4 ]       |
| keratin 7                      | KRT7            | Hs00559840_m1   | [3]        |
| keratin 8                      | KRT8            | Hs01595539_g1   | [3]        |
| calretinin                     | CALB2           | Hs00242372_m1   | [3]        |
| osteopontin                    | SPP1            | Hs00959010_m1   | [3]        |
| calponin 1                     | CNN1            | Hs00959434_m1   | [3]        |
| thrombomodulin                 | THBD            | Hs00264920_s1   | [5]        |
| e-cadherin                     | CDH1            | Hs01023895_m1   | [1]        |
| n-cadherin                     | CDH2            | Hs00983056_m1   | [6]        |
| carbonic anhydrase 2           | CA2             | Hs01070108_m1   | [1]        |
| <b>Mesenchymal markers</b>     |                 |                 |            |
| CD73                           | NT5E            | Hs00159686_m1   | [7]        |
| CD90                           | THY1            | Hs00174816_m1   | [7]        |
| CD105                          | ENG             | Hs00923996_m1   | [7]        |
| CD10                           | MME             | Hs00153510_m1   | [7, 8]     |
| CD36                           | CD36            | Hs00354519_m1   | [7]        |
| CD13                           | ANPEP           | Hs00174265_m1   | [8]        |
| CD49d                          | ITGA4           | Hs00168433_m1   | [7]        |
| <b>Housekeeping genes</b>      |                 |                 |            |
| 18S rRNA                       | 18S             | Hs99999901_s1   |            |
| peptidylprolyl isomerase A     | PPIA            | Hs04194521_s1   |            |

1. Lachaud, C.C., et al., *Use of Mesothelial Cells and Biological Matrices for Tissue Engineering of Simple Epithelium Surrogates*. Front Bioeng Biotechnol, 2015. **3**: p. 117.
2. Lachaud, C.C., et al., *EGF-induced adipose tissue mesothelial cells undergo functional vascular smooth muscle differentiation*. Cell Death Dis, 2014. **5**: p. e1304.
3. Verardo, R., et al., *Specific mesothelial signature marks the heterogeneity of mesenchymal stem cells from high-grade serous ovarian cancer*. Stem Cells, 2014. **32**(11): p. 2998-3011.
4. Chau, Y.Y., et al., *Visceral and subcutaneous fat have different origins and evidence supports a mesothelial source*. Nat Cell Biol, 2014. **16**(4): p. 367-75.

5. Verhagen, H.J., et al., *Thrombomodulin activity on mesothelial cells: perspectives for mesothelial cells as an alternative for endothelial cells for cell seeding on vascular grafts*. Br J Haematol, 1996. **95**(3): p. 542-9.
6. Mutsaers, S.E., et al., *Mesothelial cells in tissue repair and fibrosis*. Front Pharmacol, 2015. **6**: p. 113.
7. Bourin, P., et al., *Stromal cells from the adipose tissue-derived stromal vascular fraction and culture expanded adipose tissue-derived stromal/stem cells: a joint statement of the International Federation for Adipose Therapeutics and Science (IFATS) and the International Society for Cellular Therapy (ISCT)*. Cytotherapy, 2013. **15**(6): p. 641-8.
8. Bajek, A., et al., *Adipose-Derived Stem Cells as a Tool in Cell-Based Therapies*. Arch Immunol Ther Exp (Warsz), 2016. **64**(6): p. 443-454.
