# Supplementary figures and images for: Crohn’s Disease Increases the Mesothelial Properties of Adipocyte Progenitors in the Creeping Fat
Source: MDPI journal article supplement (doi:10.3390/ijms22084292), 2021-04-20

# Supplementary Figure 1

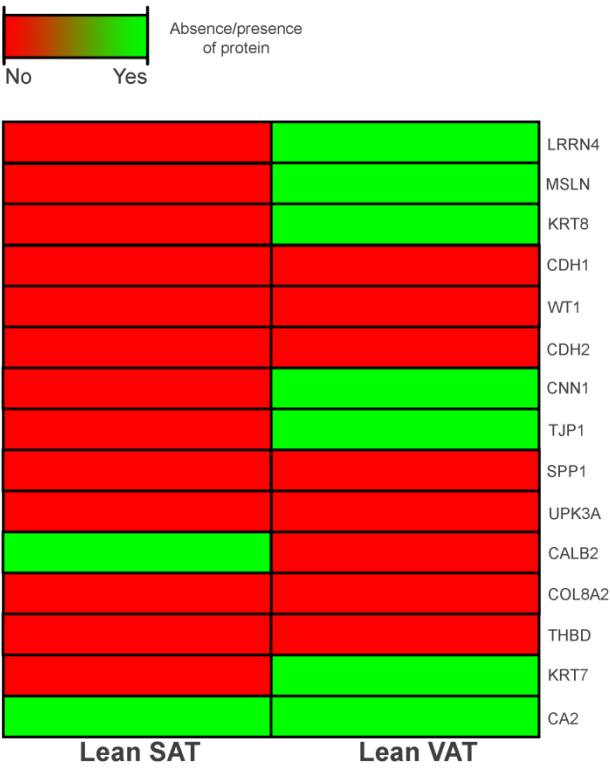

Supplementary Figure 2

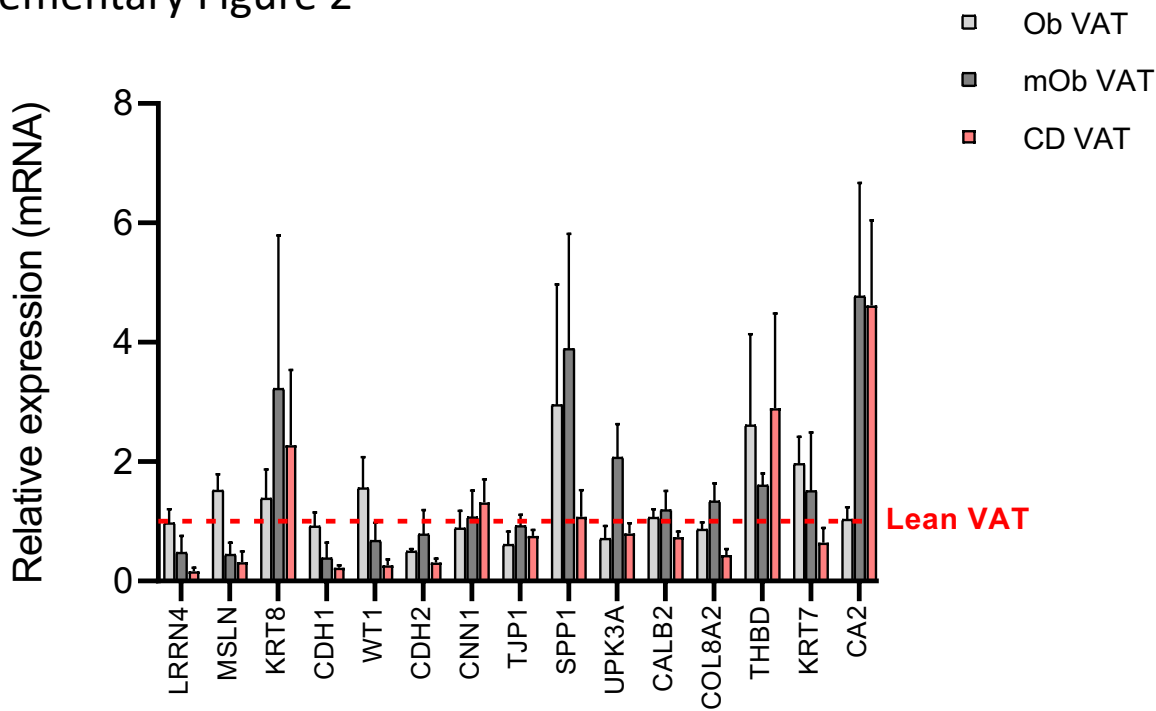

Supplementary Figure 3

A

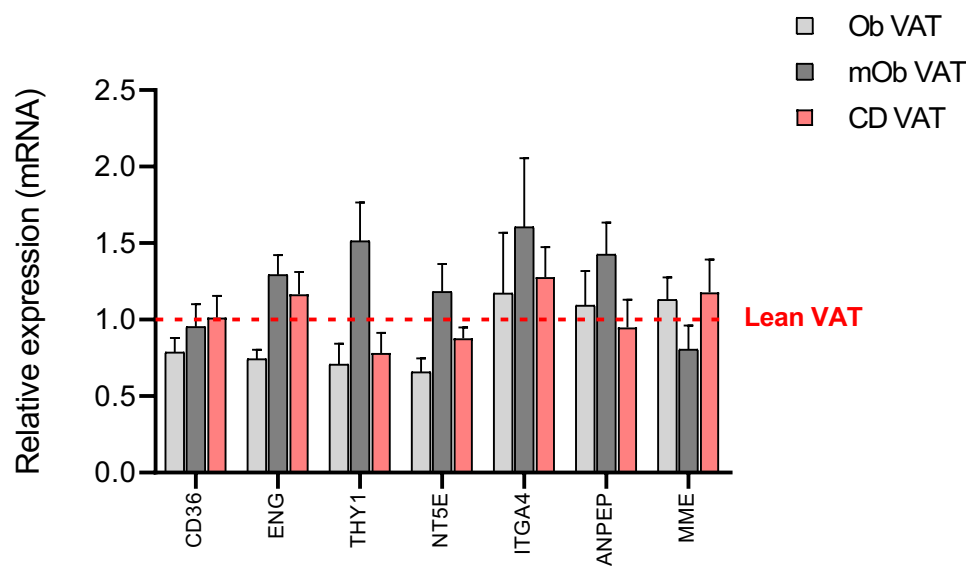

B

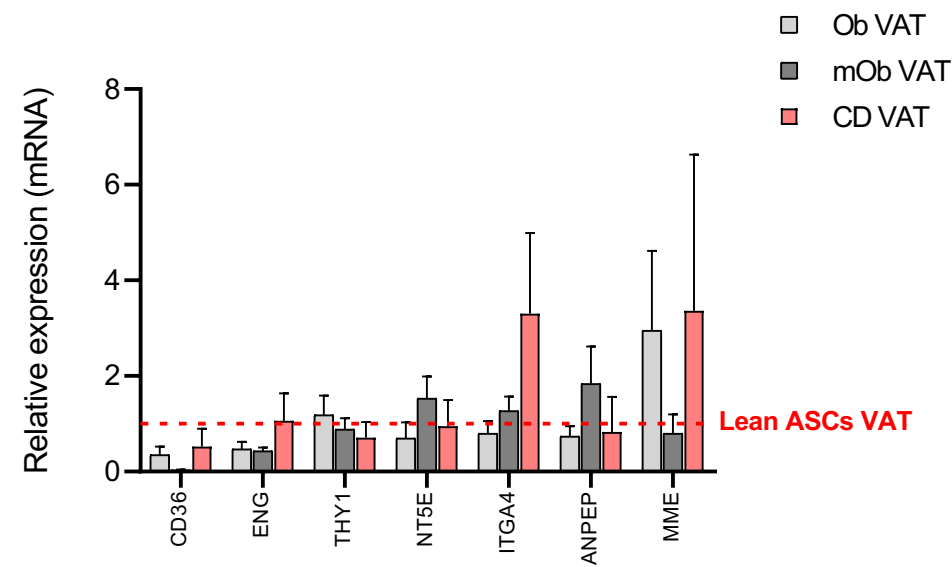

Supplementary Figure 4

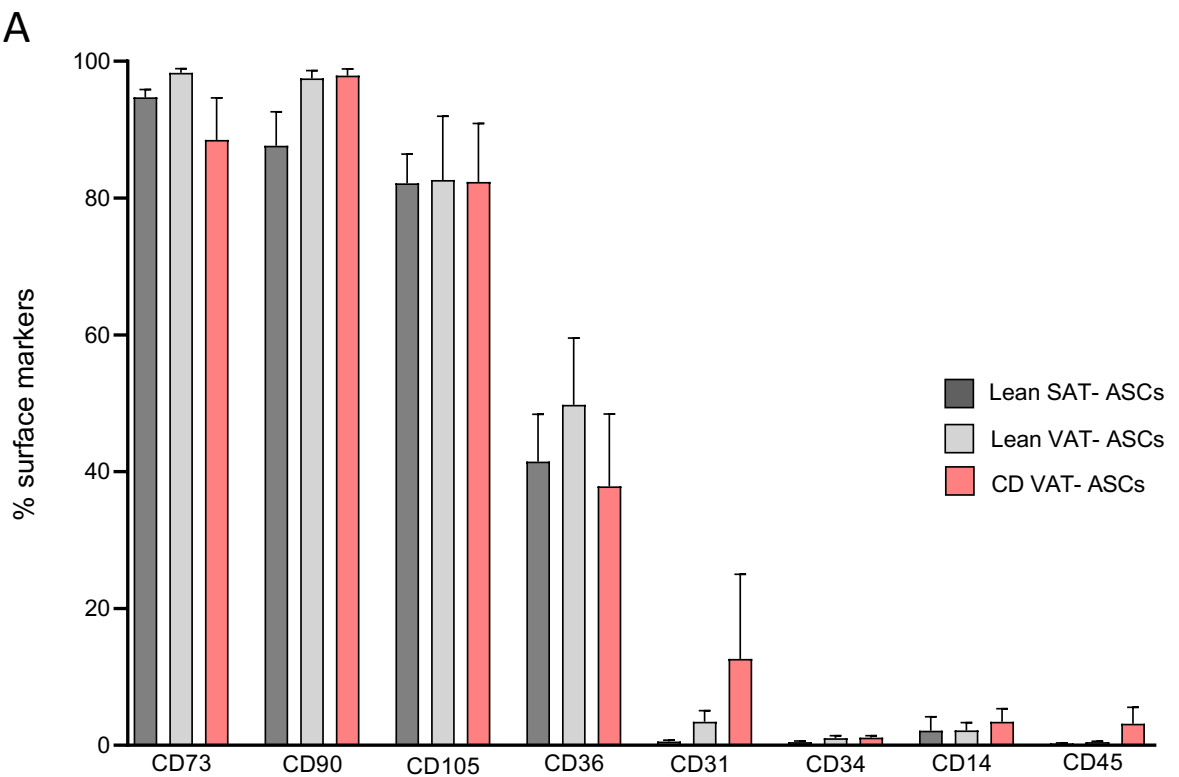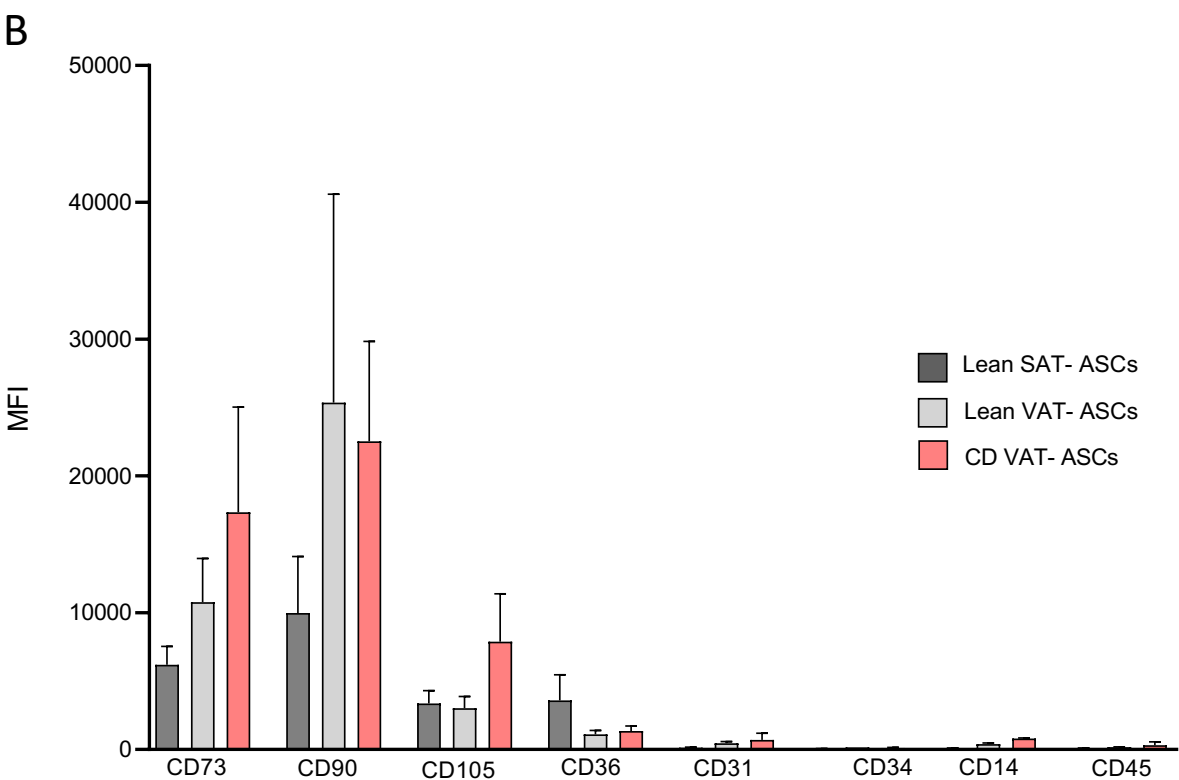

Supplement: s1 [file s1]
